# Supplementary material for: Ultra-thin coating of g-C3N4 on an aligned ZnO nanorod film for rapid charge separation and improved photodegradation performance
Source: Royal Society of Chemistry journal article supplement (doi:10.1039/c6ra16300a), 2016-01-01
Supplement: c6ra16300a1.pdf [file c6ra16300a1.pdf]

## Supporting Information

### Ultra-thin coating of g-C<sub>3</sub>N<sub>4</sub> on an aligned ZnO nanorod film for rapid charge separation and improved photodegradation performance

Tae Joon Park,<sup>[a]</sup> Rajendra C. Pawar,<sup>[b]</sup> Suhee Kang<sup>[b]</sup> and Caroline Sunyong Lee\*<sup>[b]</sup>

**[a]** Research Institute of Engineering and Technology, Hanyang University, 55 Hanyangdaehak-ro, Sangrok-gu, Ansan-si, Gyeonggi-do 426-791, Republic of Korea

**[b]** Department of Materials Engineering, Hanyang University, 55 Hanyangdaehak-ro, Sangrok-gu, Ansan-si, Gyeonggi-do 426-791, Republic of Korea

Correspondence should be addressed to Caroline Sunyong Lee;  
sunyonglee@hanyang.ac.kr

#### Figure captions:

**Figure S1.** Field-emission scanning electron microscope (FE-SEM) surface images of (a) 1D ZnO/gC<sub>3</sub>N<sub>4</sub>\_1, (b) ZnO/gC<sub>3</sub>N<sub>4</sub>\_2 and (c) ZnO/gC<sub>3</sub>N<sub>4</sub>\_3.

**Figure S2.** XRD patterns of 1D ZnO nanorods, pure g-C<sub>3</sub>N<sub>4</sub> and the 1D ZnO/gC<sub>3</sub>N<sub>4</sub> films as a function of melamine amount.

**Figure S3.** (a) A linear potential sweep voltammetry plot and the (b) photocurrent density of the ZnO nanorod film and the 1D ZnO/gC<sub>3</sub>N<sub>4</sub> films as a function of melamine amount under visible-light irradiation. EIS Nyquist plots of the ZnO nanorod film and the 1D ZnO/gC<sub>3</sub>N<sub>4</sub> films as a function of melamine amount (c) in the dark and (d) under visible-light irradiation.

**Figure S4.** (a) Ultraviolet-visible (UV-Vis) absorbance spectra and (b) a plot of the Kubelka–Munk function of the ZnO nanorod film and the 1D ZnO/gC<sub>3</sub>N<sub>4</sub> films as a function of melamine amount.

**Figure S5.** The temporal absorption spectral changes of MB dye during its photodegradation in the presence of (a) the ZnO nanorods films, (b) g-C<sub>3</sub>N<sub>4</sub> films and (c) the 1D ZnO/gC<sub>3</sub>N<sub>4</sub> films.

**Figure S6.** The weight of the 1D ZnO/gC<sub>3</sub>N<sub>4</sub> films (a) before first photocatalytic reaction, (b) after first photocatalytic reaction and (c) after second photocatalytic reaction.

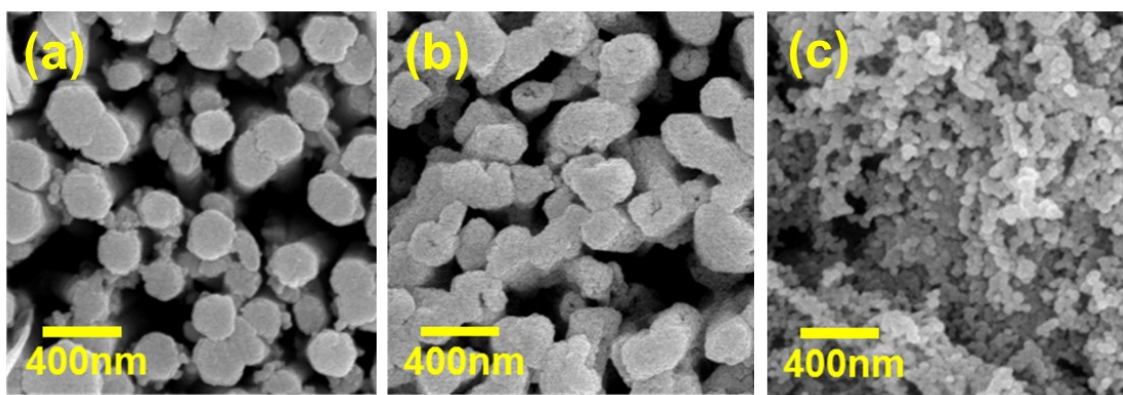

**Figure S1. (a)-(c)**

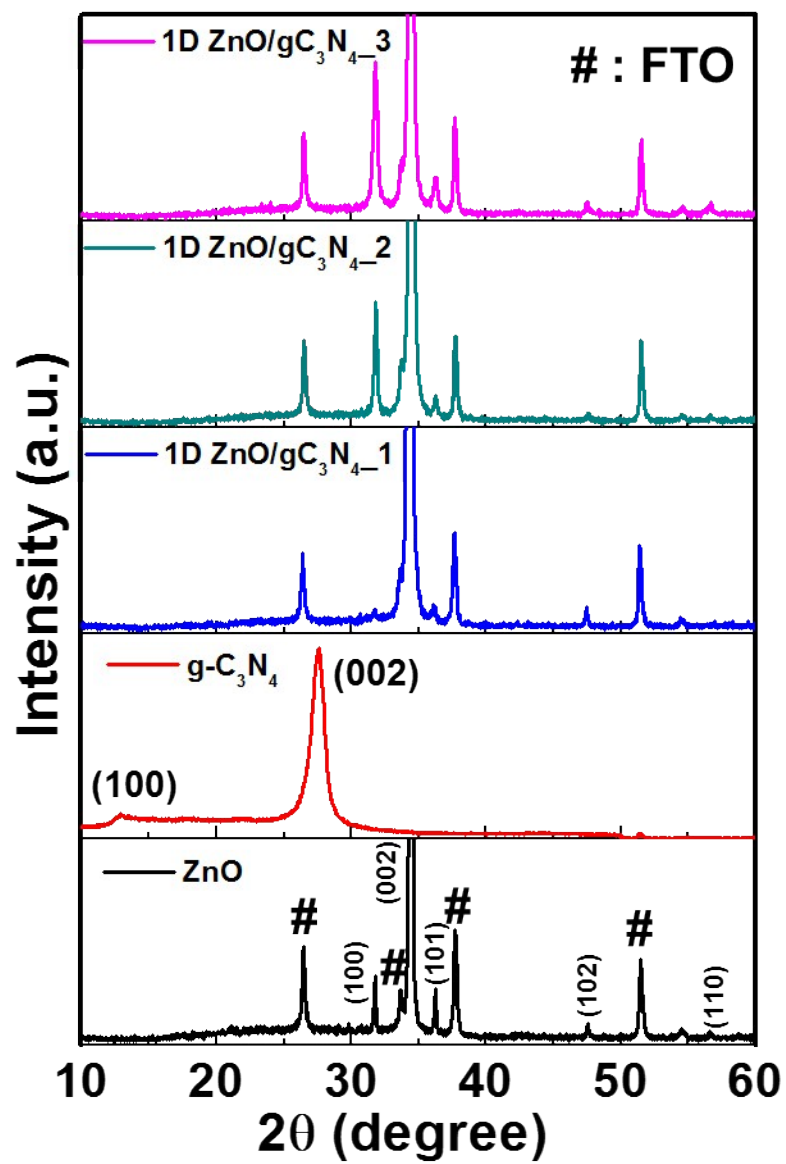

Figure S2.

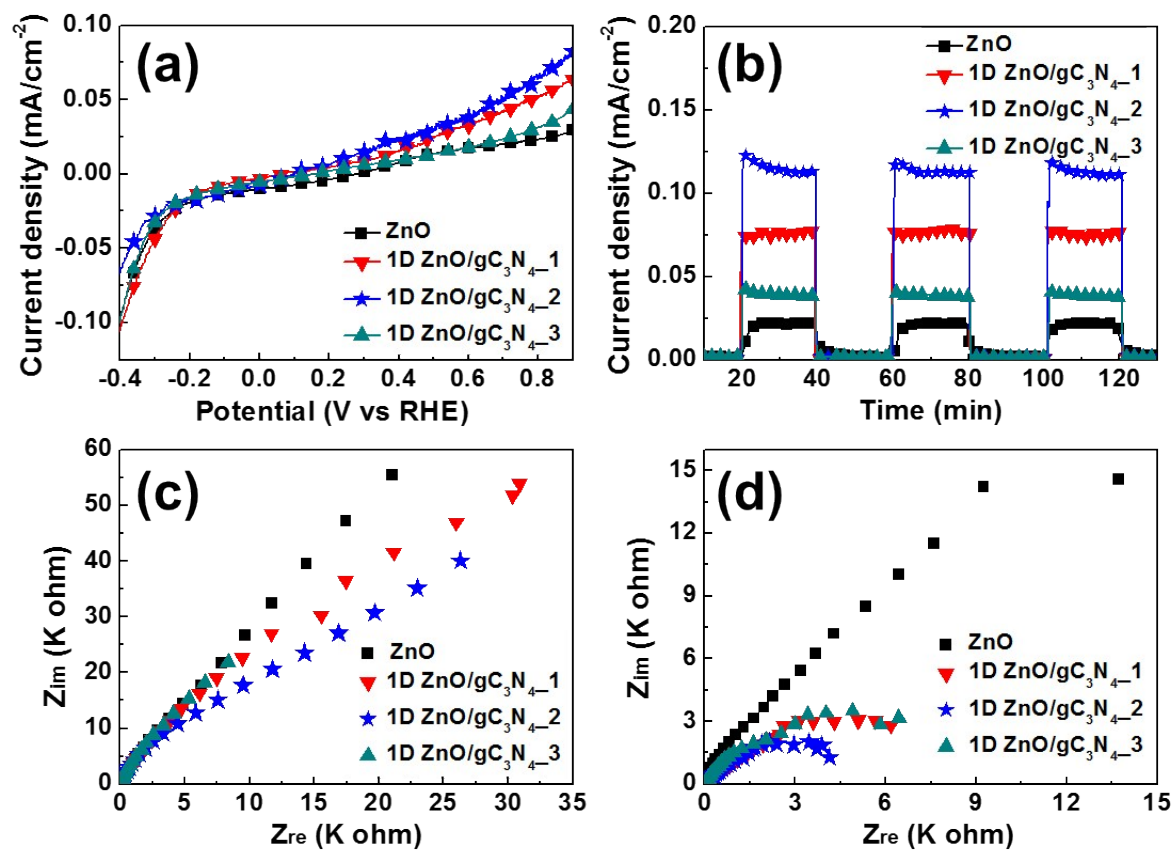

Figure S3. (a)-(d)

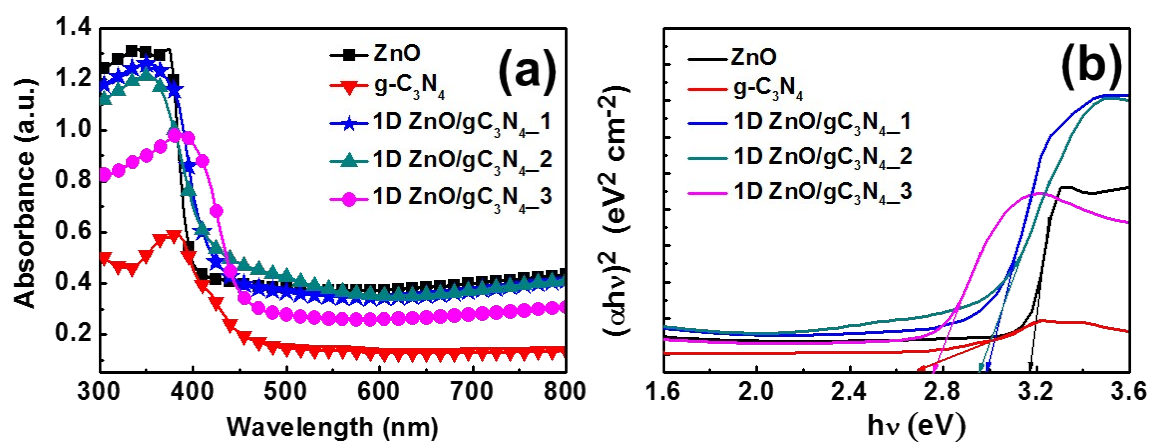

Figure S4. (a),(b)

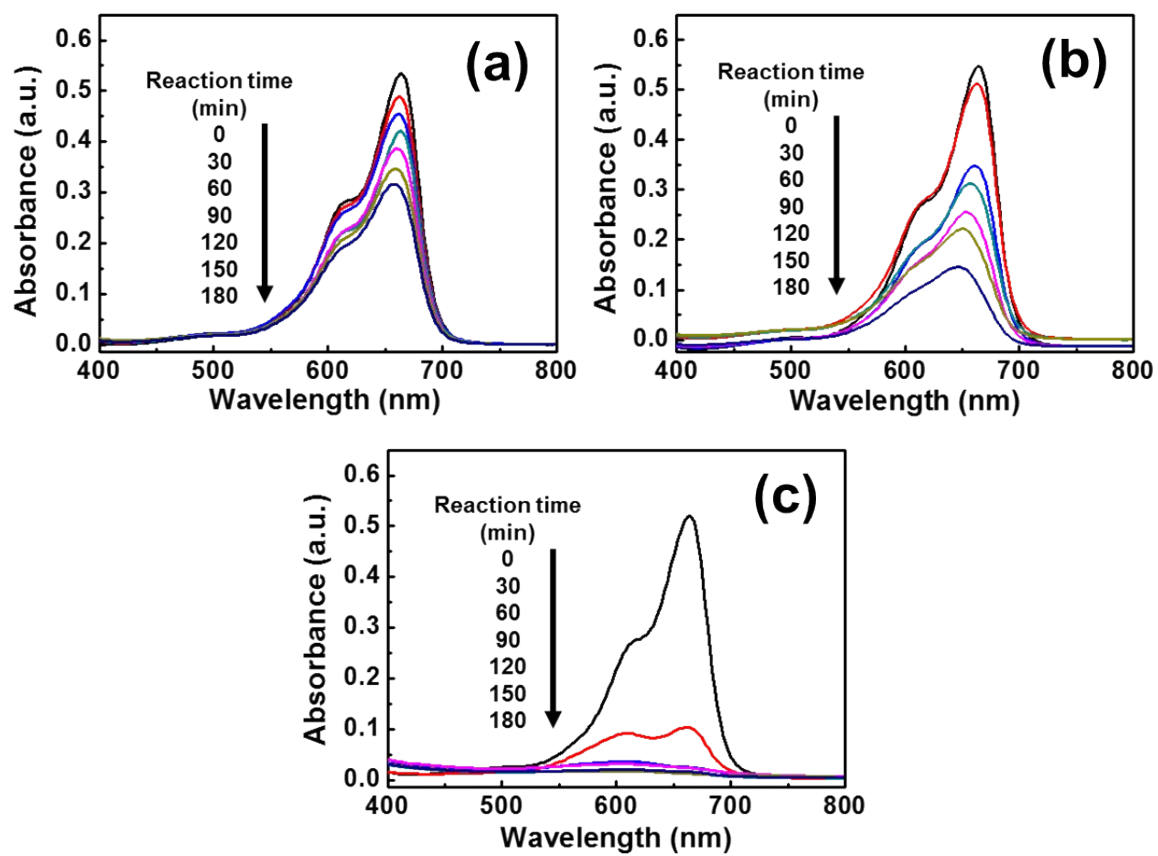

Figure S5. (a)-(c)

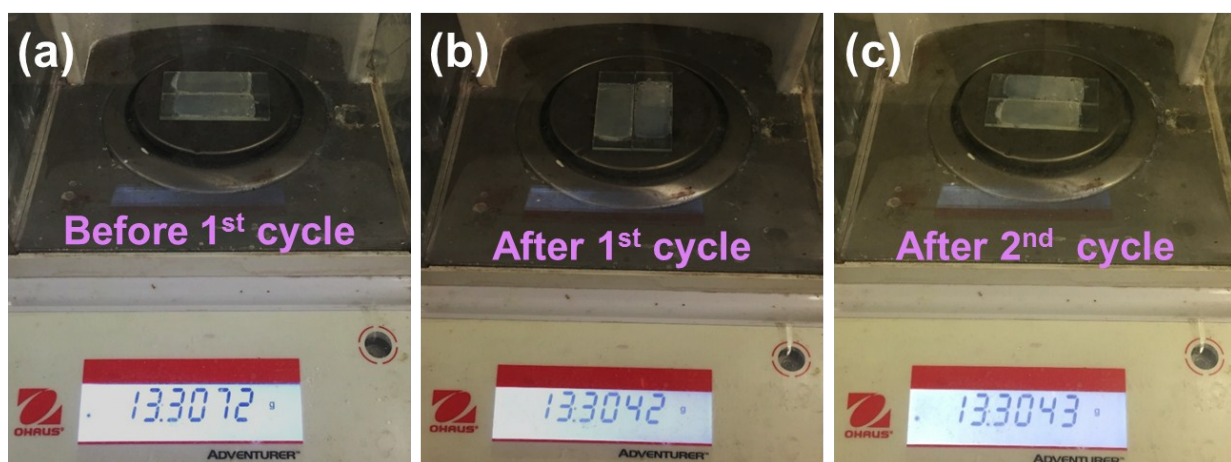

**Figure S6. (a)-(c)**
